# Supplementary material for: A human-specific allelic group of the MHC DRB1 gene in primates
Source: PubMed Central journal article supplement (PMC4072476; doi:10.1186/1880-6805-33-14), 2014-06-13

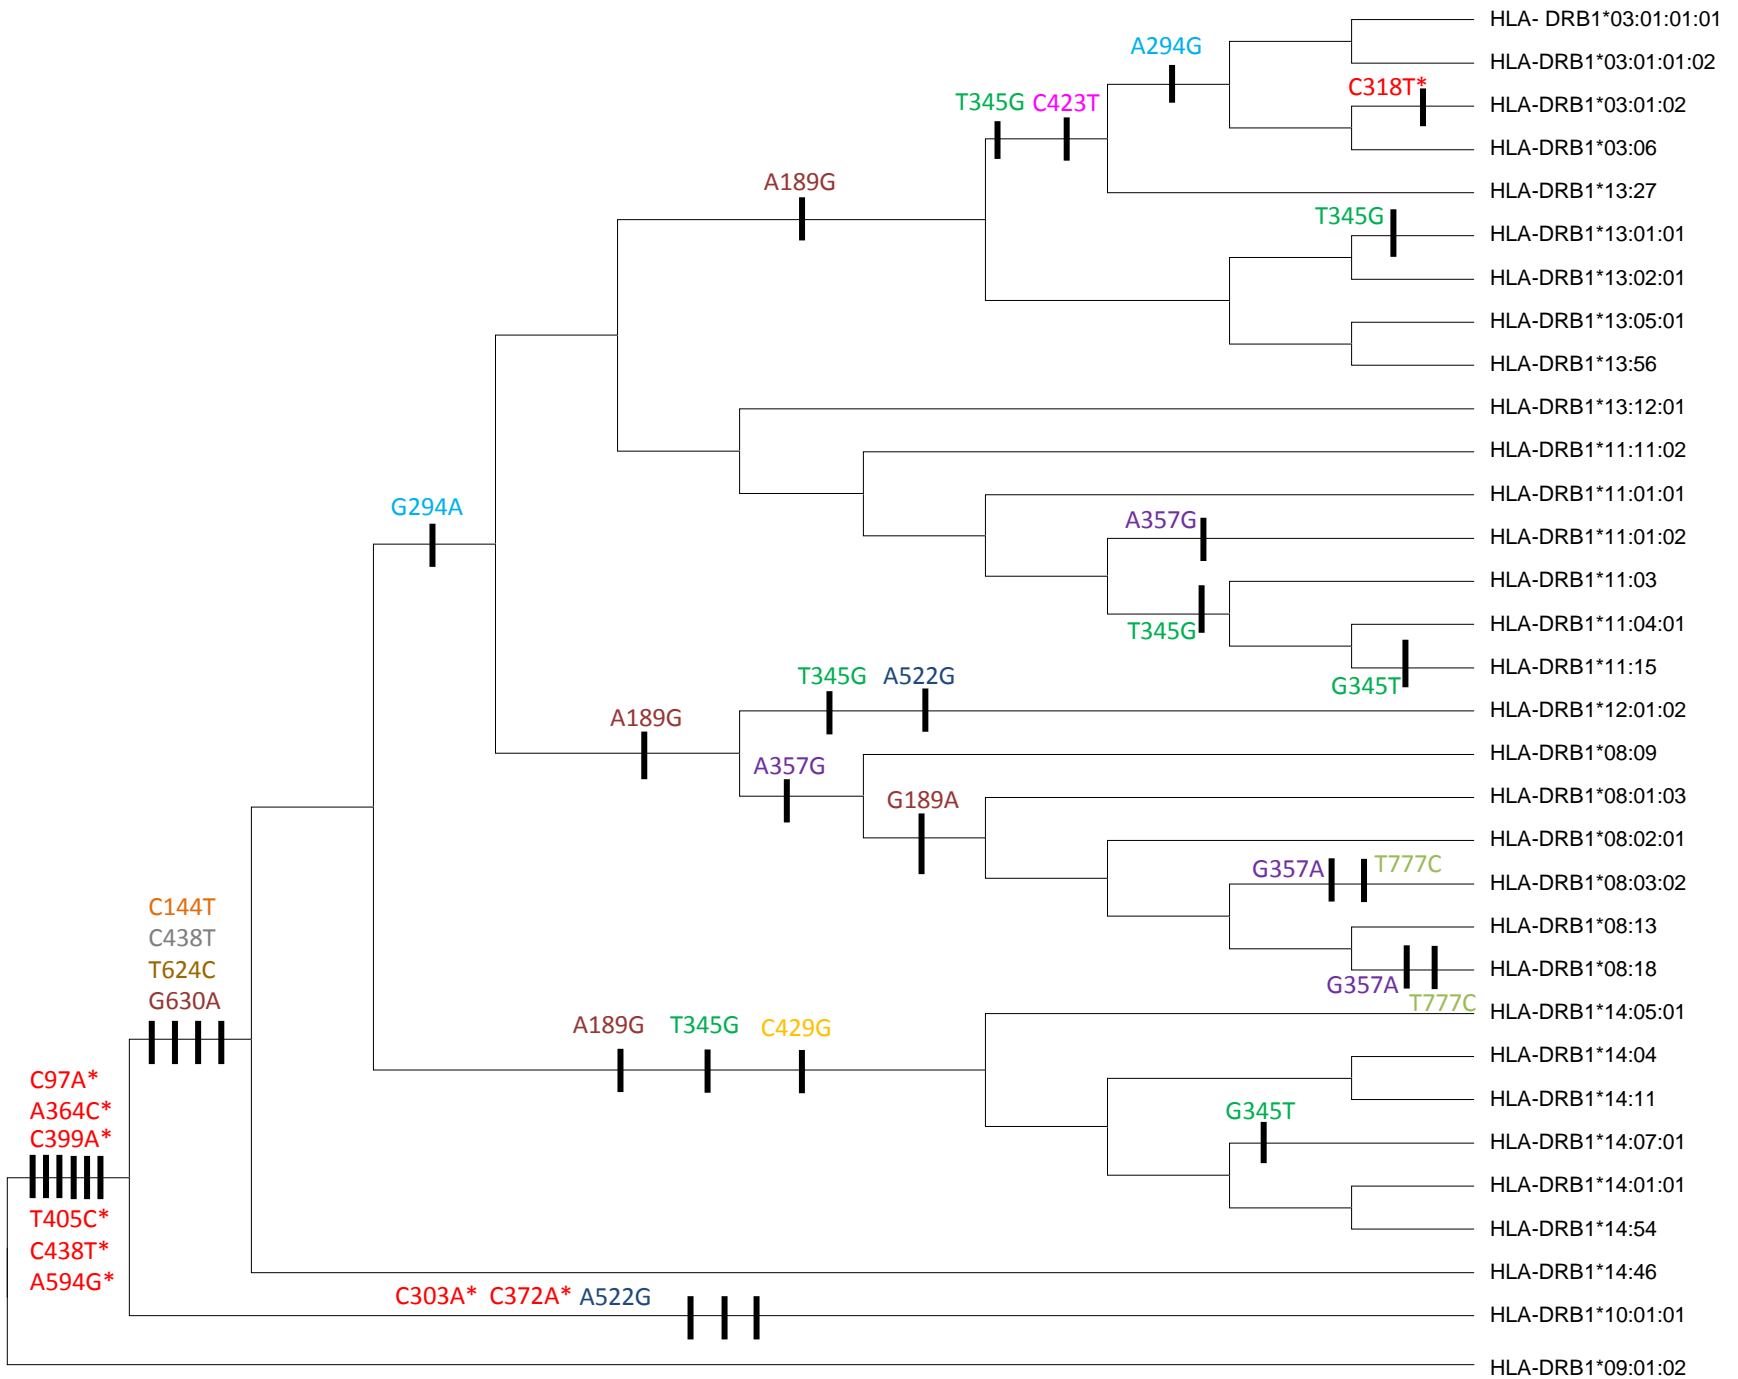

Supplement: 1880-6805-33-14-S1.pdf [file 1880-6805-33-14-S1.pdf]
