# Supplementary material for: A human-specific allelic group of the MHC DRB1 gene in primates
Source: PubMed Central journal article supplement (PMC4072476; doi:10.1186/1880-6805-33-14), 2014-06-13
Supplement: 1880-6805-33-14-S2.pdf [file 1880-6805-33-14-S2.pdf]

DRB1\*0301

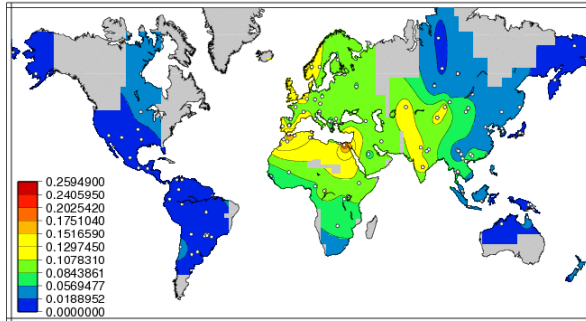

Image from Solberg et al. (2008) – see [www.pypop.org/popdata](http://www.pypop.org/popdata) for more info.

DRB1\*0802

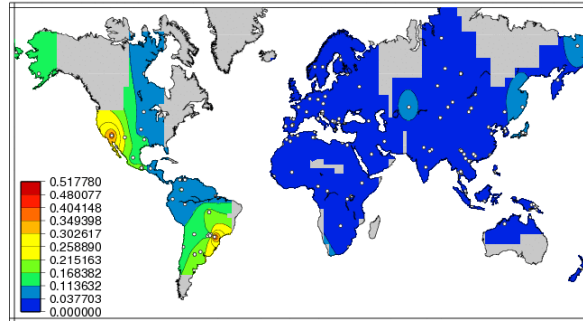

Image from Solberg et al. (2008) – see [www.pypop.org/popdata](http://www.pypop.org/popdata) for more info.

DRB1\*1101

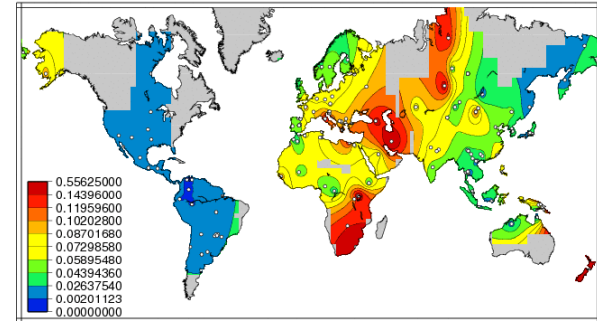

Image from Solberg et al. (2008) – see [www.pypop.org/popdata](http://www.pypop.org/popdata) for more info.

DRB1\*1102

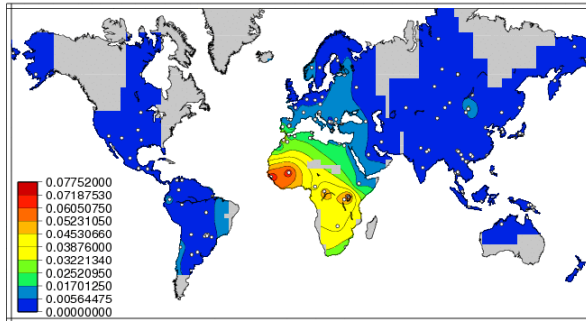

Image from Solberg et al. (2008) – see [www.pypop.org/popdata](http://www.pypop.org/popdata) for more info.

DRB1\*1103

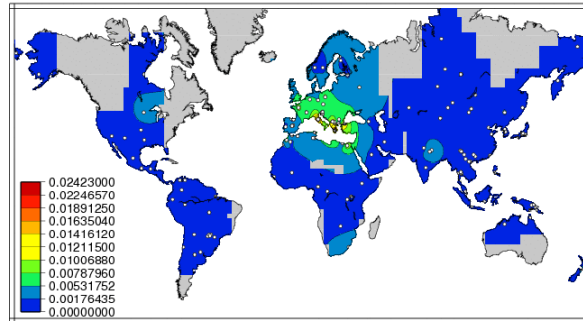

Image from Solberg et al. (2008) – see [www.pypop.org/popdata](http://www.pypop.org/popdata) for more info.

DRB1\*1104

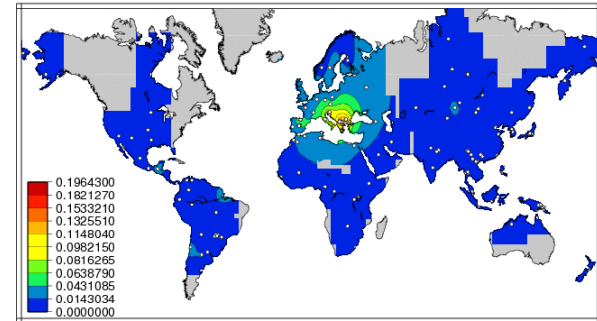

Image from Solberg et al. (2008) – see [www.pypop.org/popdata](http://www.pypop.org/popdata) for more info.

DRB1\*1201

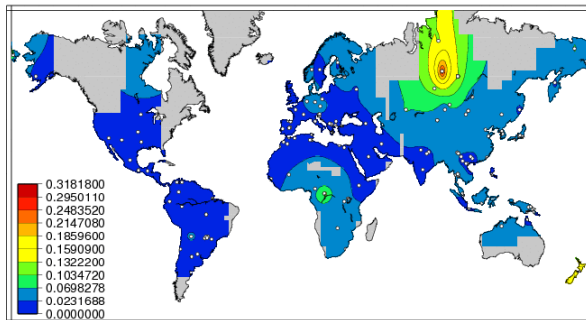

Image from Solberg et al. (2008) – see [www.pypop.org/popdata](http://www.pypop.org/popdata) for more info.

DRB1\*1401

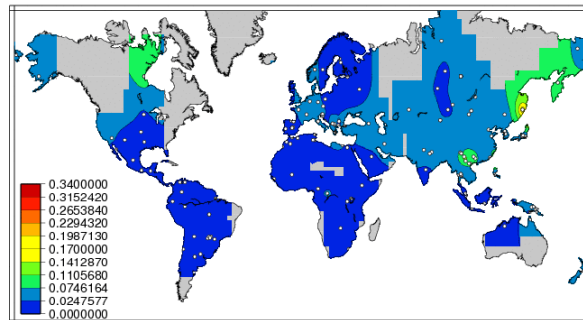

Image from Solberg et al. (2008) – see [www.pypop.org/popdata](http://www.pypop.org/popdata) for more info.
